# Supplementary material for: Analysis of the Clinical Efficacy and Molecular Mechanism of Xuefu Zhuyu Decoction in the Treatment of COPD Based on Meta-Analysis and Network Pharmacology
Source: Hindawi journal article supplement (doi:10.1155/2022/2615580), 2022-11-26

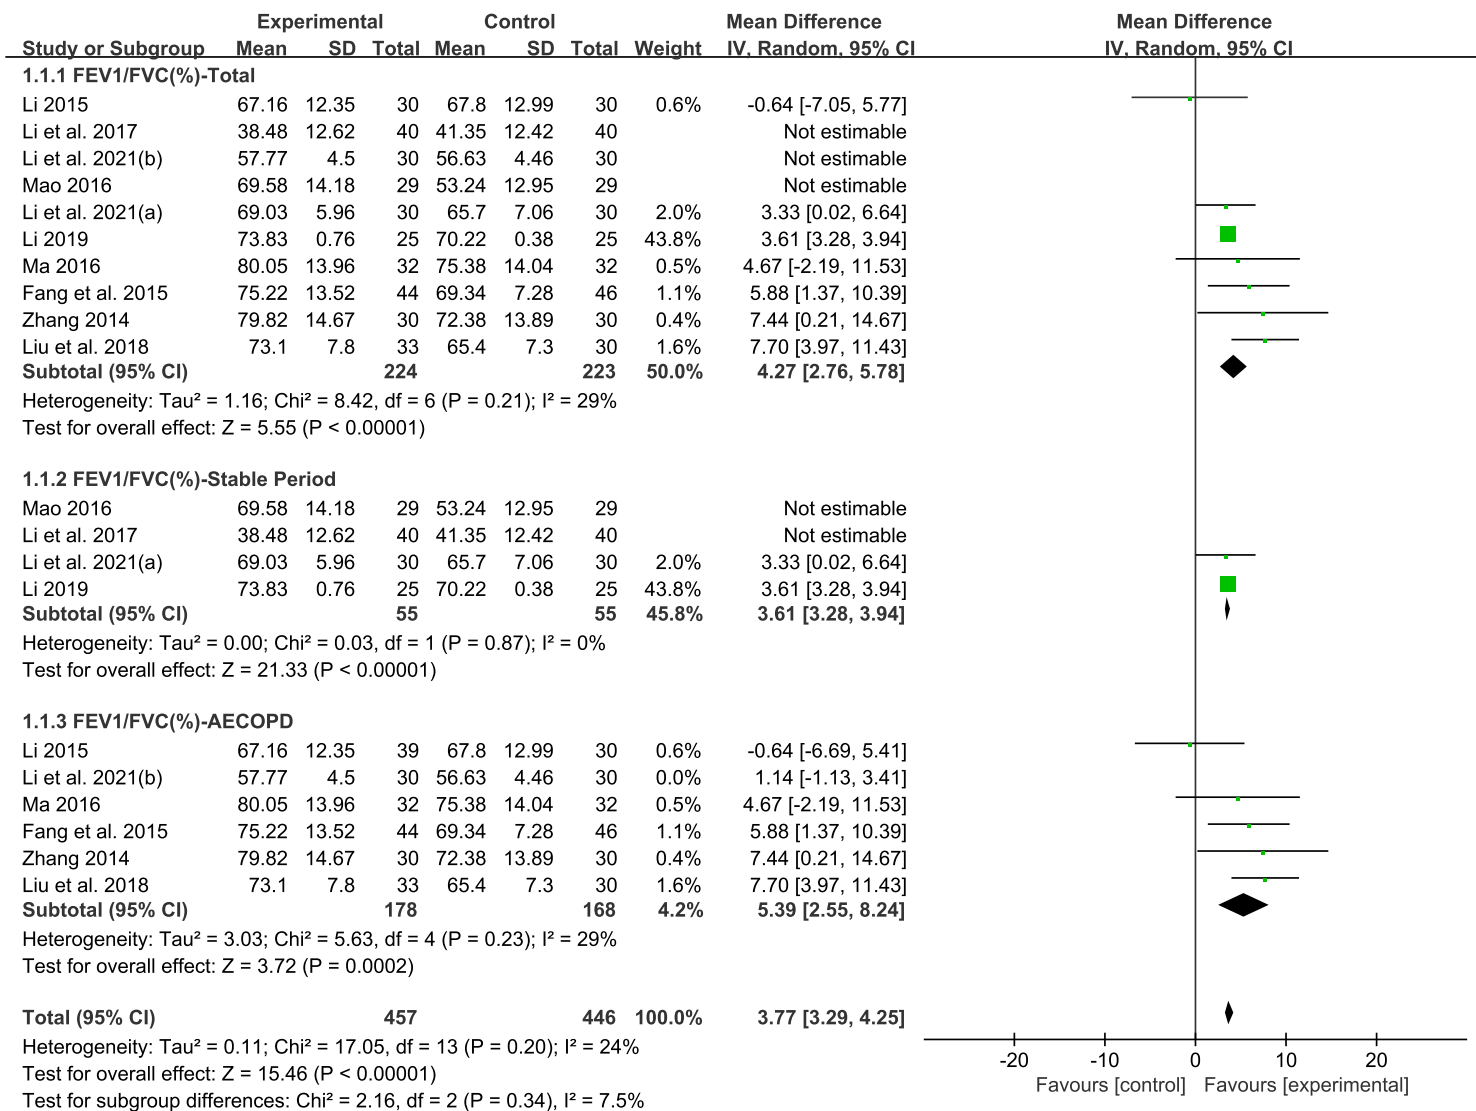

Supplement: f2 [file 2615580.f2.pdf]
