# Supplementary material for: Analysis of the Clinical Efficacy and Molecular Mechanism of Xuefu Zhuyu Decoction in the Treatment of COPD Based on Meta-Analysis and Network Pharmacology
Source: Hindawi journal article supplement (doi:10.1155/2022/2615580), 2022-11-26
Supplement: f3 [file 2615580.f3.pdf]

## Xuefu Zhuyu Decoction combined with symptomatic supportive treatments for COPD

**Patient or population:** patients with COPD

**Settings:**

**Intervention:** Xuefu Zhuyu Decoction combined with symptomatic supportive treatments

| Outcomes                                               | Illustrative comparative risks* (95% CI)                                                                                             | Relative effect (95% CI) | No of Participants (studies) | Quality of the evidence (GRADE)           | Comments |
|--------------------------------------------------------|--------------------------------------------------------------------------------------------------------------------------------------|--------------------------|------------------------------|-------------------------------------------|----------|
|                                                        | Control                                                                                                                              |                          |                              |                                           |          |
| <b>FEV1/FVC(%) - FEV1/FVC(%)<sup>-</sup>Total</b>      | The mean fev1/fvc(%) - fev1/fvc(%) <sup>-</sup> -total in the intervention groups was<br><b>4.12 higher</b><br>(2.09 to 6.15 higher) |                          | 645<br>(10 studies)          | ⊕ ⊕ ⊕ ⊕<br><b>low</b> <sup>1,2</sup>      |          |
| <b>FEV1% - FEV1%<sup>-</sup>Total</b>                  | The mean fev1% - fev1% <sup>-</sup> -total in the intervention groups was<br><b>7.33 higher</b><br>(2.38 to 12.27 higher)            |                          | 381<br>(6 studies)           | ⊕ ⊕ ⊕ ⊕<br><b>low</b> <sup>1,2</sup>      |          |
| <b>FEV1 - FEV1<sup>-</sup>Total</b>                    | The mean fev1 - fev1 <sup>-</sup> -total in the intervention groups was<br><b>0.16 higher</b><br>(0.06 to 0.26 higher)               |                          | 604<br>(9 studies)           | ⊕ ⊕ ⊕ ⊕<br><b>low</b> <sup>1,2,3</sup>    |          |
| <b>P(O2) - P(O2)<sup>-</sup>Total</b>                  | The mean p(o2) - p(o2) <sup>-</sup> -total in the intervention groups was<br><b>8.38 higher</b><br>(4.88 to 11.88 higher)            |                          | 413<br>(6 studies)           | ⊕ ⊕ ⊕ ⊕<br><b>low</b> <sup>1,2</sup>      |          |
| <b>P(CO2) - P(CO2)<sup>-</sup>Total</b>                | The mean p(co2) - p(co2) <sup>-</sup> -total in the intervention groups was<br><b>3.43 lower</b><br>(5.57 to 1.28 lower)             |                          | 413<br>(6 studies)           | ⊕ ⊕ ⊕ ⊕<br><b>low</b> <sup>1,2</sup>      |          |
| <b>Clinical efficacy rate - Clinical efficacy rate</b> | <b>Study population</b>                                                                                                              | <b>RR 1.26</b>           | 485<br>(8 studies)           | ⊕ ⊕ ⊕ ⊕<br><b>moderate</b> <sup>1</sup>   |          |
|                                                        | <b>746 per 1000</b> <b>940 per 1000</b><br>(873 to 1000)                                                                             |                          |                              |                                           |          |
|                                                        | <b>Moderate</b>                                                                                                                      |                          |                              |                                           |          |
| <b>Adverse events</b>                                  | <b>Study population</b>                                                                                                              | <b>OR 0.19</b>           | 290<br>(4 studies)           | ⊕ ⊕ ⊕ ⊕<br><b>very low</b> <sup>1,3</sup> |          |
|                                                        | <b>14 per 1000</b> <b>3 per 1000</b><br>(0 to 53)                                                                                    |                          |                              |                                           |          |
|                                                        | <b>Moderate</b>                                                                                                                      |                          |                              |                                           |          |
|                                                        | <b>0 per 1000</b> <b>0 per 1000</b><br>(0 to 0)                                                                                      |                          |                              |                                           |          |

|                |                                                                                                            |                    |                                             |                            |
|----------------|------------------------------------------------------------------------------------------------------------|--------------------|---------------------------------------------|----------------------------|
| <b>D-dimer</b> | The mean d-dimer in the intervention groups was <b>2.41 standard deviations lower</b> (3.98 to 0.84 lower) | 333<br>(5 studies) | ⊕ ⊕ ⊕ ⊕<br><b>low</b> <sup>1,2</sup>        | SMD -2.41 (-3.98 to -0.84) |
| <b>FIB</b>     | The mean fib in the intervention groups was <b>1.45 lower</b> (2.16 to 0.74 lower)                         | 270<br>(4 studies) | ⊕ ⊕ ⊕ ⊕<br><b>low</b> <sup>1,2</sup>        |                            |
| <b>PT</b>      | The mean pt in the intervention groups was <b>3.01 higher</b> (2.51 to 3.52 higher)                        | 183<br>(3 studies) | ⊕ ⊕ ⊕ ⊕<br><b>moderate</b> <sup>1,2</sup>   |                            |
| <b>APTT</b>    | The mean aptt in the intervention groups was <b>1.46 higher</b> (1.15 lower to 4.07 higher)                | 273<br>(4 studies) | ⊕ ⊕ ⊕ ⊕<br><b>very low</b> <sup>1,2,3</sup> |                            |

\*The basis for the **assumed risk** (e.g. the median control group risk across studies) is provided in footnotes. The **corresponding risk** (and its 95% confidence interval) is based on the assumed risk in the comparison group and the **relative effect** of the intervention (and its 95% CI).

**CI:** Confidence interval; **RR:** Risk ratio; **OR:** Odds ratio;

GRADE Working Group grades of evidence

**High quality:** Further research is very unlikely to change our confidence in the estimate of effect.

**Moderate quality:** Further research is likely to have an important impact on our confidence in the estimate of effect and may change the estimate.

**Low quality:** Further research is very likely to have an important impact on our confidence in the estimate of effect and is likely to change the estimate.

**Very low quality:** We are very uncertain about the estimate.

<sup>1</sup> There are unclear risks on random sequence generation, allocation concealment, blinding of participants and personnel, blinding of outcome assessment

<sup>2</sup> The outcome is heterogeneous

<sup>3</sup> Real effects exceed the upper and lower bounds of the confidence interval
